# Supplementary material
Source: PubMed Central journal article supplement (PMC1959461)

Cross scheme

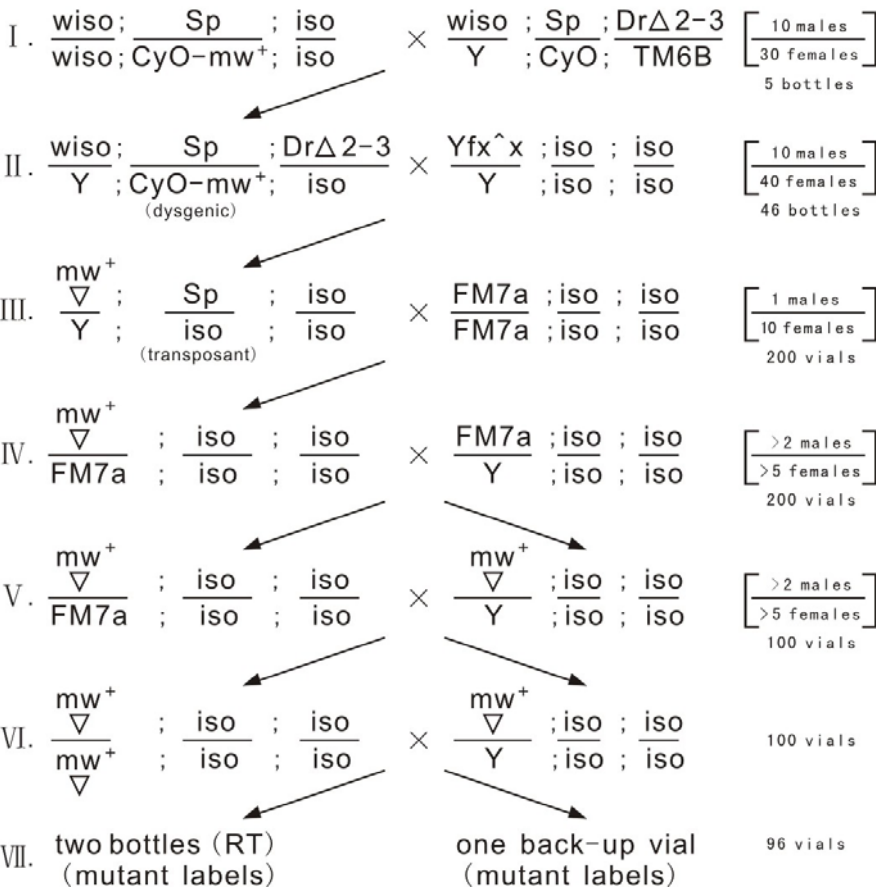

Supplement: pnas_0700439104_1.pdf [file pnas_0700439104_1.pdf]
